# Supplementary figures and images for: Fourier representation for optical soliton pulse propagating in photonic crystal fibers
Source: Research Square preprint supplement (doi:10.21203/rs.3.rs-7370809/v1), 2025-09-17

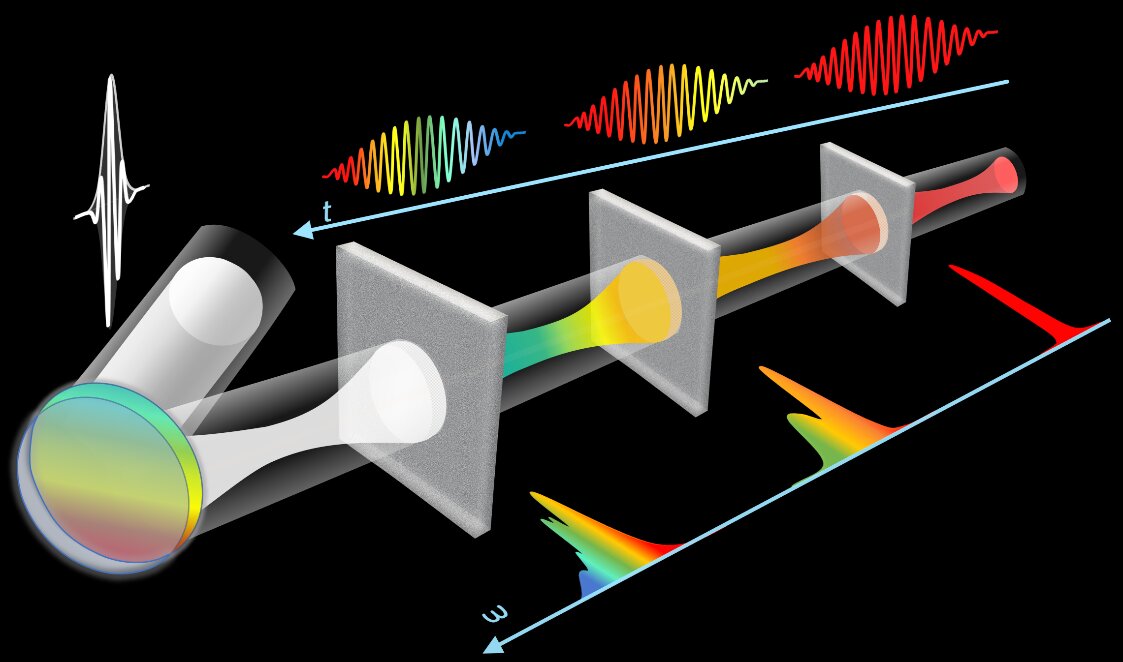


Graphical abstract

Supplement: Supplementary file 1 [file 938fe489ef54a4a4d2365a4f.docx]
